# Supplementary material
Source: PubMed Central journal article supplement (PMC5587400)
Supplement: NIHMS894629-supplement-1.pdf [file NIHMS894629-supplement-1.pdf]

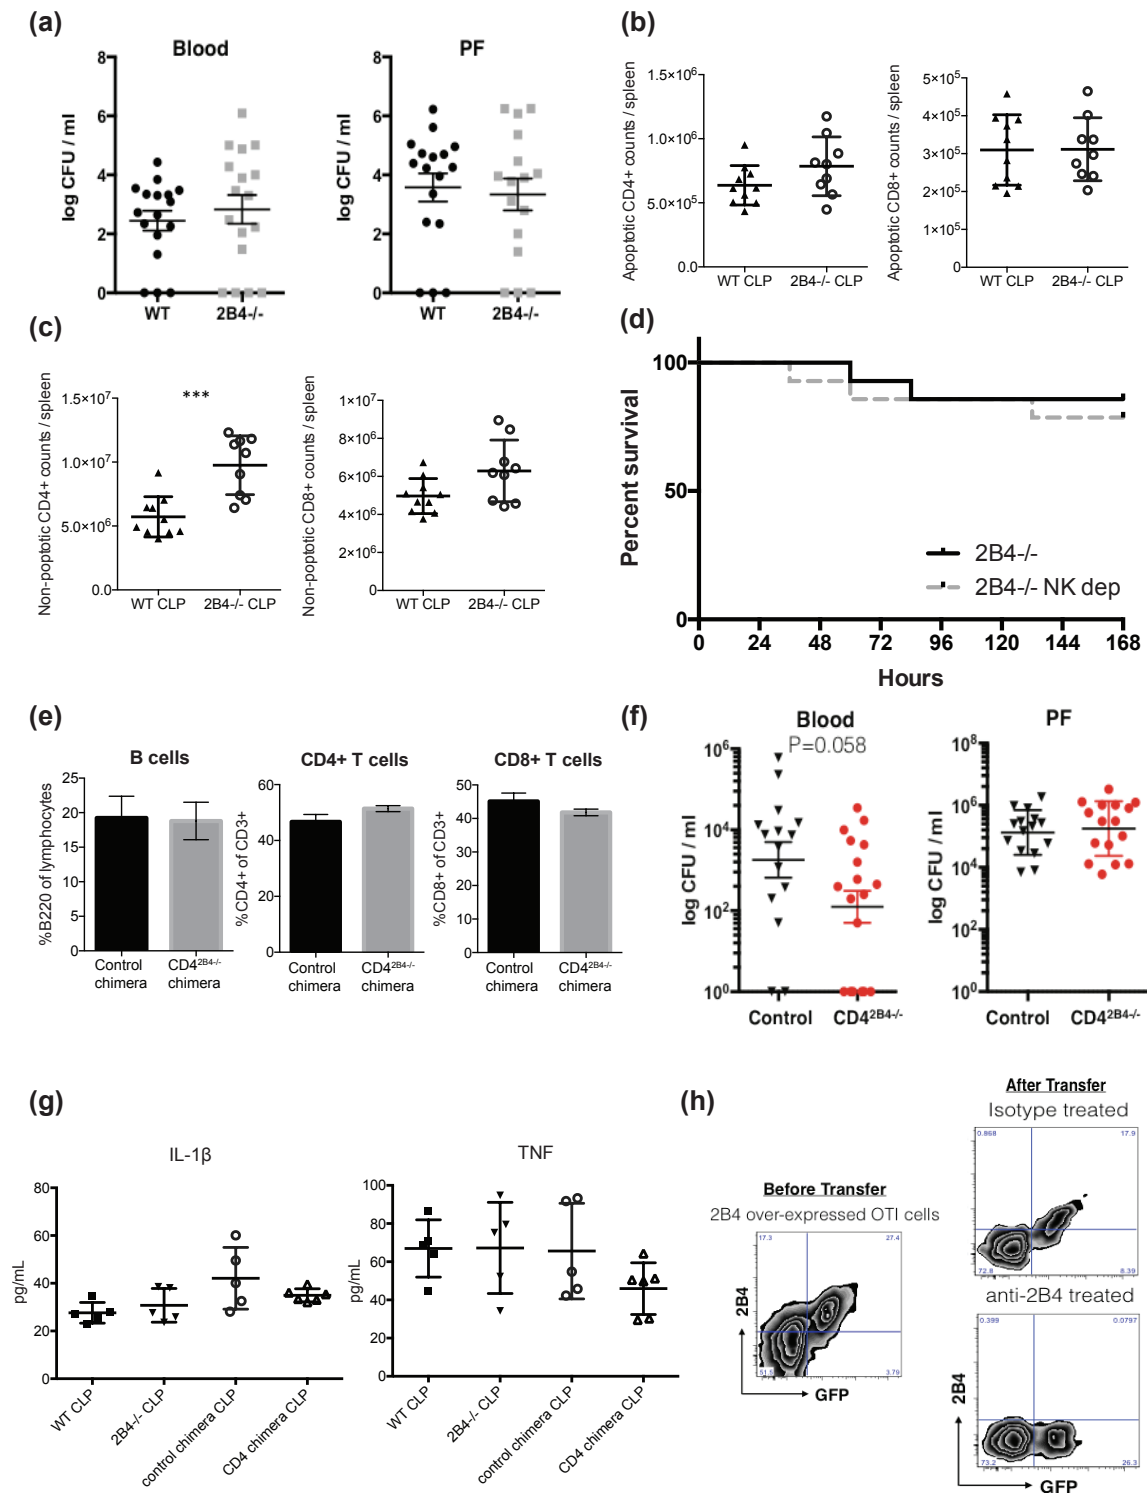

1

2 *Supplemental Figure 1a. Bacterial cultures showed no difference between WT and 2B4<sup>-/-</sup> animals.*

3 WT and 2B4<sup>-/-</sup> animals were subjected to CLP. After 24 hours post-surgery, blood was collected

4 by cardiac puncture and peritoneal fluid was obtained by injection of 2mL 0.9% sterile saline

5 into the mouse peritoneum at 24 hours post-sepsis. Samples were serially diluted and a 100  $\mu$ l

6 aliquot of each sample was plated on sheep's blood agar plates and incubated at 37°C in 5% CO<sub>2</sub>

7 for 24 hours. Bacterial colony counts were obtained from plates containing fewer than 300  
8 colonies and the colony-forming units (CFUs) per ml of original specimen were determined.  
9 *Supplemental Figure 1b. 2B4<sup>-/-</sup> and WT animals exhibited similar numbers of apoptotic cell after*  
10 *CLP.* Age and gender matched WT and 2B4<sup>-/-</sup> animals were subjected to CLP and sacrificed at 24  
11 hours. Apoptotic cells were identified as Caspase3/7<sup>+</sup>SYTOX<sup>-</sup> and the absolute cell counts are  
12 determined.  
13 *Supplemental Figure 1c. 2B4<sup>-/-</sup> animals retained higher number of non-apoptotic cell numbers*  
14 *after CLP.* Age and gender matched WT and 2B4<sup>-/-</sup> animals were subjected to CLP and sacrificed  
15 at 24 hours. Non-apoptotic and non-necrotic cells were identified as Caspase3/7<sup>-</sup>SYTOX<sup>-</sup> and the  
16 absolute cell counts are determined.  
17 *Supplemental Figure 1d. NK depletion in 2B4<sup>-/-</sup> animals displayed no survival disadvantages.* 2B4<sup>-/-</sup>  
18 animals were treated with anti-asialoGM1 one day before surgery to deplete NK cell population.  
19 NK cells depletion has confirmed by flow cytometer (data not shown). The CLP survival was  
20 performed on 2B4<sup>-/-</sup> animals and 2B4<sup>-/-</sup> animals with NK cells depletion.  
21 *Supplemental Figure 1e. The lymphocyte compositions of chimera animals are the same.* Blood  
22 samples collected from control chimera and CD4<sup>2B4<sup>-/-</sup></sup> chimera mice prior to CLP and  
23 composition of individual immune cell compartments was analyzed.  
24 *Supplemental Figure 1f. Bacterial cultures showed no difference between CD4<sup>2B4<sup>-/-</sup></sup> chimeric*  
25 *animals and control chimera.* The control chimera and CD4<sup>2B4<sup>-/-</sup></sup> chimeric animals were subjected  
26 to CLP. The blood and peritoneal fluid were collected and bacterial load was determined at 24  
27 hours post-surgery.  
28 *Supplemental Figure 1g. Serum cytokine levels are similar between chimeric animals.* Serum were  
29 collected and the level of TNF and IL-1 $\beta$  at 24 h post-CLP in WT, 2B4<sup>-/-</sup>, control WT chimeric and  
30 CD4<sup>2B4<sup>-/-</sup></sup> chimeric animals were measured by Bio-Plex Pro™ (BIO-RAD).  
31 *Supplemental Figure 1h. Monoclonal anti-2B4 antibody (clone: 2B4) displayed no depletion effect*  
32 *on 2B4-expressing retrogenic OT-I cells.* 2B4 over-expressed retrogenic OTI cells were generated  
33 by a previously described method [19]. Two million 2B4 over-expressed OTI cells were  
34 adoptively transferred into WT animals which were treated with intraperitoneal anti-2B4 mAb  
35 (250 $\mu$ g) to determine the depletion effect. Animals were sacrificed 24 hours after mAb  
36 treatment and transferred OTI T cells were analyzed by flow cytometry.  
37

**Table 1 — Septic Patients Demographics**

| Patient | Age | Gender | Weight (kg) | Race      | Hospital LOS* (Days) | ICU LOS* (Days) | Intubated | Discharge status | Sepsis source | Sepsis Organism                                                                                              | WBC** | ALC*** | 2B4% of CD4+ T cells | 2B4% of CD8+ T cells |
|---------|-----|--------|-------------|-----------|----------------------|-----------------|-----------|------------------|---------------|--------------------------------------------------------------------------------------------------------------|-------|--------|----------------------|----------------------|
| #1      | 74  | M      | 78          | Black     | 4                    | 3               | Y         | Dead             | Respiratory   | Bacillus species- not anthrax and coagulase negative Staphylococcus                                          | 25.5  | 2.5    | 22.0                 | 31.8                 |
| #2      | 32  | M      | 61.7        | Black     | 18                   | 2               | N         | Home             | Urine         | Escherichia coli and Stenotrophomonas maltophilia                                                            | 3.3   | 0.1    | 1.5                  | 65.4                 |
| #3      | 52  | M      | 65.9        | Black     | 17                   | 7               | Y         | Skilled Nursing  | Respiratory   | Methicillin resistant staphylococcus aureus and Escherichia coli                                             | 14.9  | 0.4    | 5.6                  | 65.5                 |
| #4      | 79  | M      | 77          | Black     | 10                   | 4               | Y         | Skilled Nursing  | Respiratory   | Escherichia coli, Enterococcus faecalis, and Klebsiella pneumoniae ssp pneumoniae and Haemophilus influenzae | 4.8   | 0.2    | 10.6                 | 82.9                 |
| #5      | 87  | F      | 82          | Black     | 28                   | 2               | N         | Skilled Nursing  | Respiratory   | Not identified                                                                                               | 7.5   | 1      | 13.4                 | 54.0                 |
| #6      | 19  | F      | 64          | Other     | 7                    | 4               | Y         | Home             | Respiratory   | MSSA                                                                                                         | 7.5   | 0.8    | 61.6                 | 96.8                 |
| #7      | 47  | M      | 70          | Caucasian | 31                   | 8               | Y         | Home             | Urine         | Staphylococcus aureus                                                                                        | 12.5  | 0.4    | 2.5                  | 16.3                 |
| #8      | 51  | F      | 65          | Black     | 11                   | 10              | Y         | Hospice          | Respiratory   | Escherichia coli, yeast, Staphylococcus aureus, and Coagulase negative Staphylococcus                        | 18.6  | 1.1    | 5.6                  | 49.9                 |
| #9      | 49  | M      | 90          | Black     | 49                   | 25              | Y         | Home             | Respiratory   | Klebsiella pneumoniae                                                                                        | 13.9  | 1      | 6.0                  | 33.7                 |
| #10     | 33  | M      | 136         | Black     | 11                   | 4               | Y         | Rehab            | Blood         | Not identified                                                                                               | 7.1   | 1.4    | 0.9                  | 45.9                 |
| #11     | 59  | M      | 106         | Black     | 21                   | 2               | Y         | Home             | Respiratory   | Staphylococcus aureus, Alpha (Viridans) Streptococcus, Enterobacter aerogenes, Staphylococcus aureus         | 9.1   | 0.5    | 6.8                  | 56.0                 |
| #12     | 46  | M      | 121         | Caucasian | 30                   | 16              | Y         | Rehab            | Respiratory   | Acinetobacter calcoaceticus-baumannii complex                                                                | 11.2  | 2.1    | 1.6                  | 26.9                 |

38 **Table 1: Septic Patients Demographics** \* Length of stay (LOT) \*\*White Blood cell  
39 Counts (WBC), \*\*\*Absolutely Lymphocyte Counts (ALC)
